# Supplementary material for: microRNA-142 guards against autoimmunity by controlling Treg cell homeostasis and function
Source: PubMed Central journal article supplement (PMC8893712; doi:10.1371/journal.pbio.3001552), 2022-02-18

A

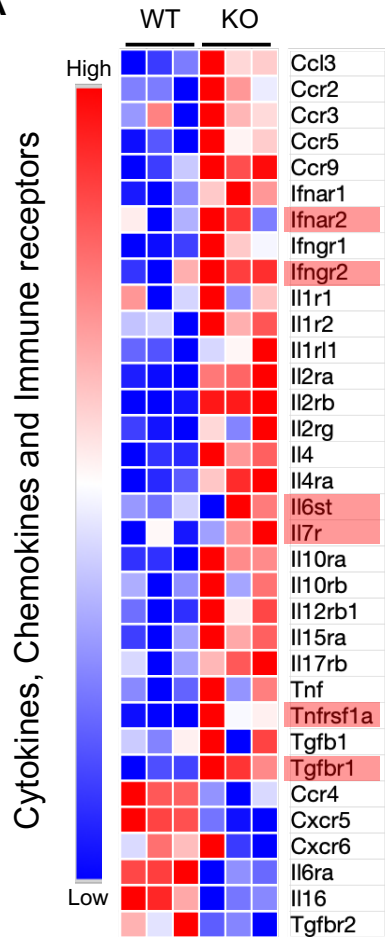

B

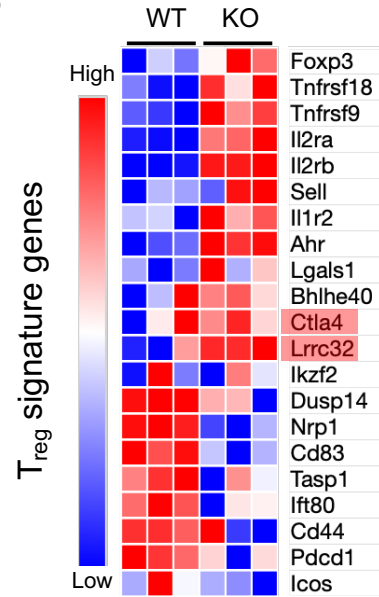

C

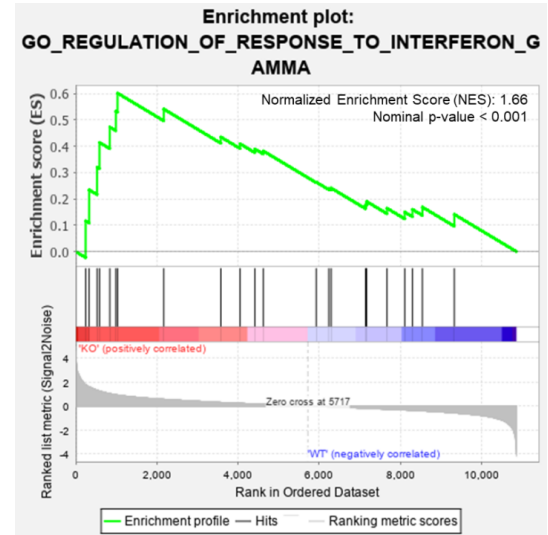

D

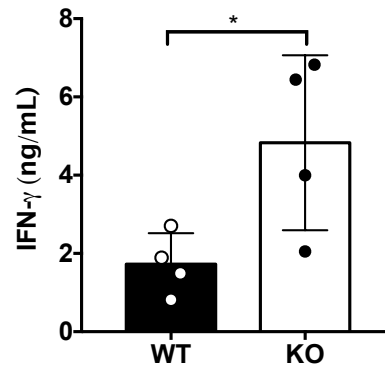

E

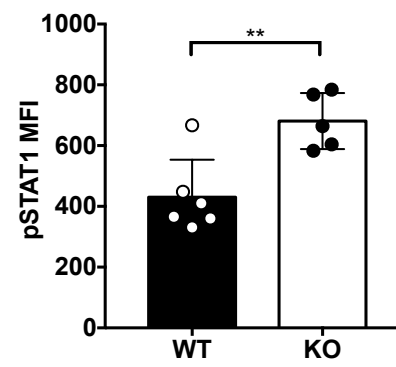

Supplement: pbio.3001552.s004.pdf [file pbio.3001552.s004.pdf]
