# Supplementary material for: microRNA-142 guards against autoimmunity by controlling Treg cell homeostasis and function
Source: PubMed Central journal article supplement (PMC8893712; doi:10.1371/journal.pbio.3001552), 2022-02-18

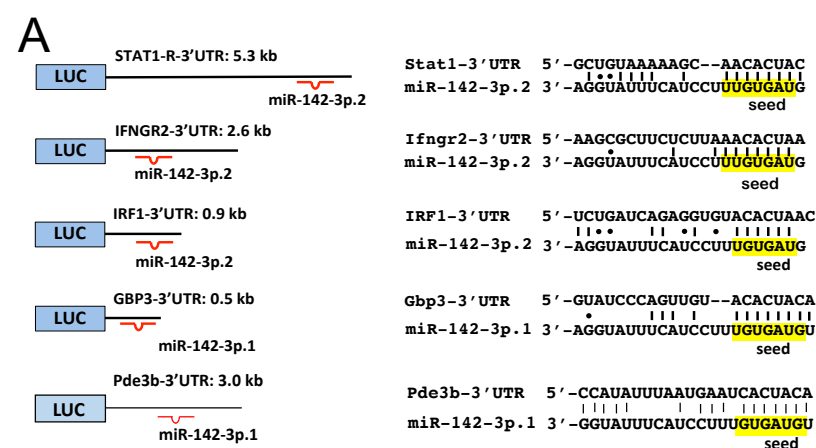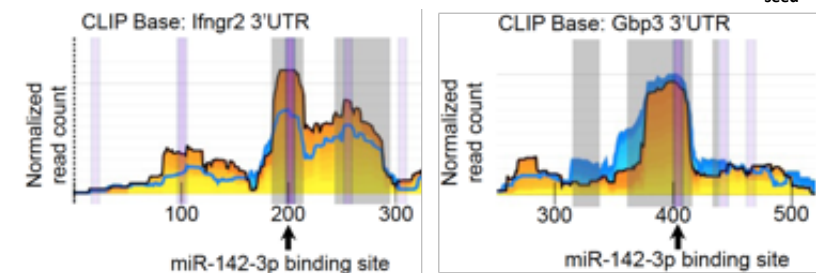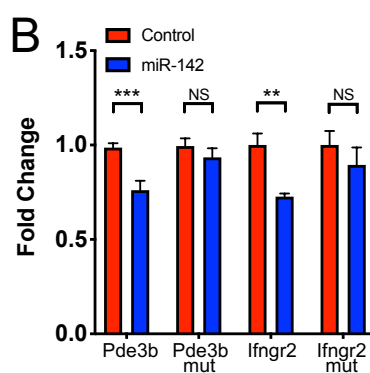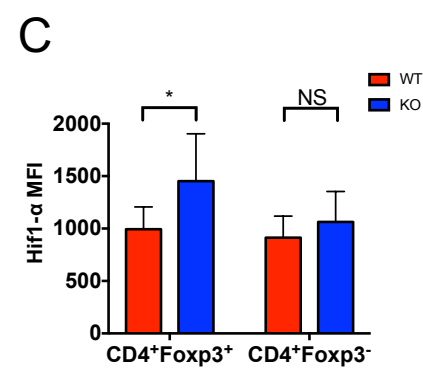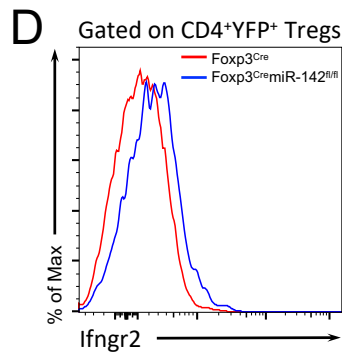

Ifngr2 protein expression

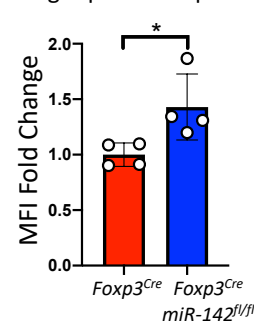

**E**

Mouse Pde3b ENSMUST0000032909.8 3' UTR length: 3003

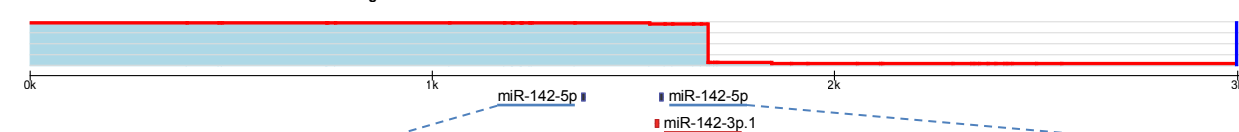

**F**

Pde3b-WT 3'UTR 5' -CCAUUUUAAUGAAUCACUACA  
miR-142-3p.1 3' -GGUAUUUCAUCCUUUGUGAUGU  
Pde3b-MUT 3'UTR 5' -CCAUUUUAAUGAAUCCAGCCA  
seed

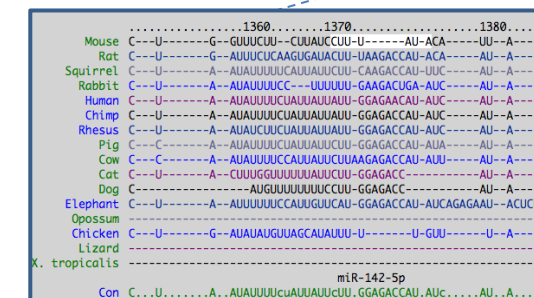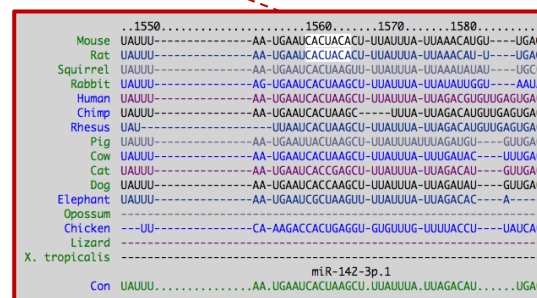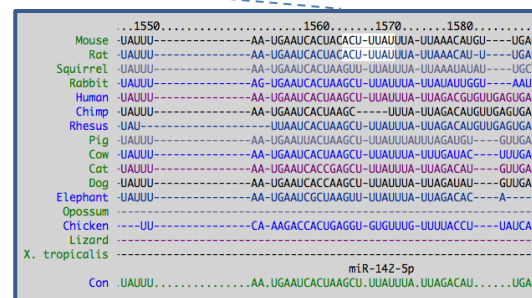

Supplement: pbio.3001552.s005.pdf [file pbio.3001552.s005.pdf]
