# Supplementary material for: microRNA-142 guards against autoimmunity by controlling Treg cell homeostasis and function
Source: PubMed Central journal article supplement (PMC8893712; doi:10.1371/journal.pbio.3001552), 2022-02-18

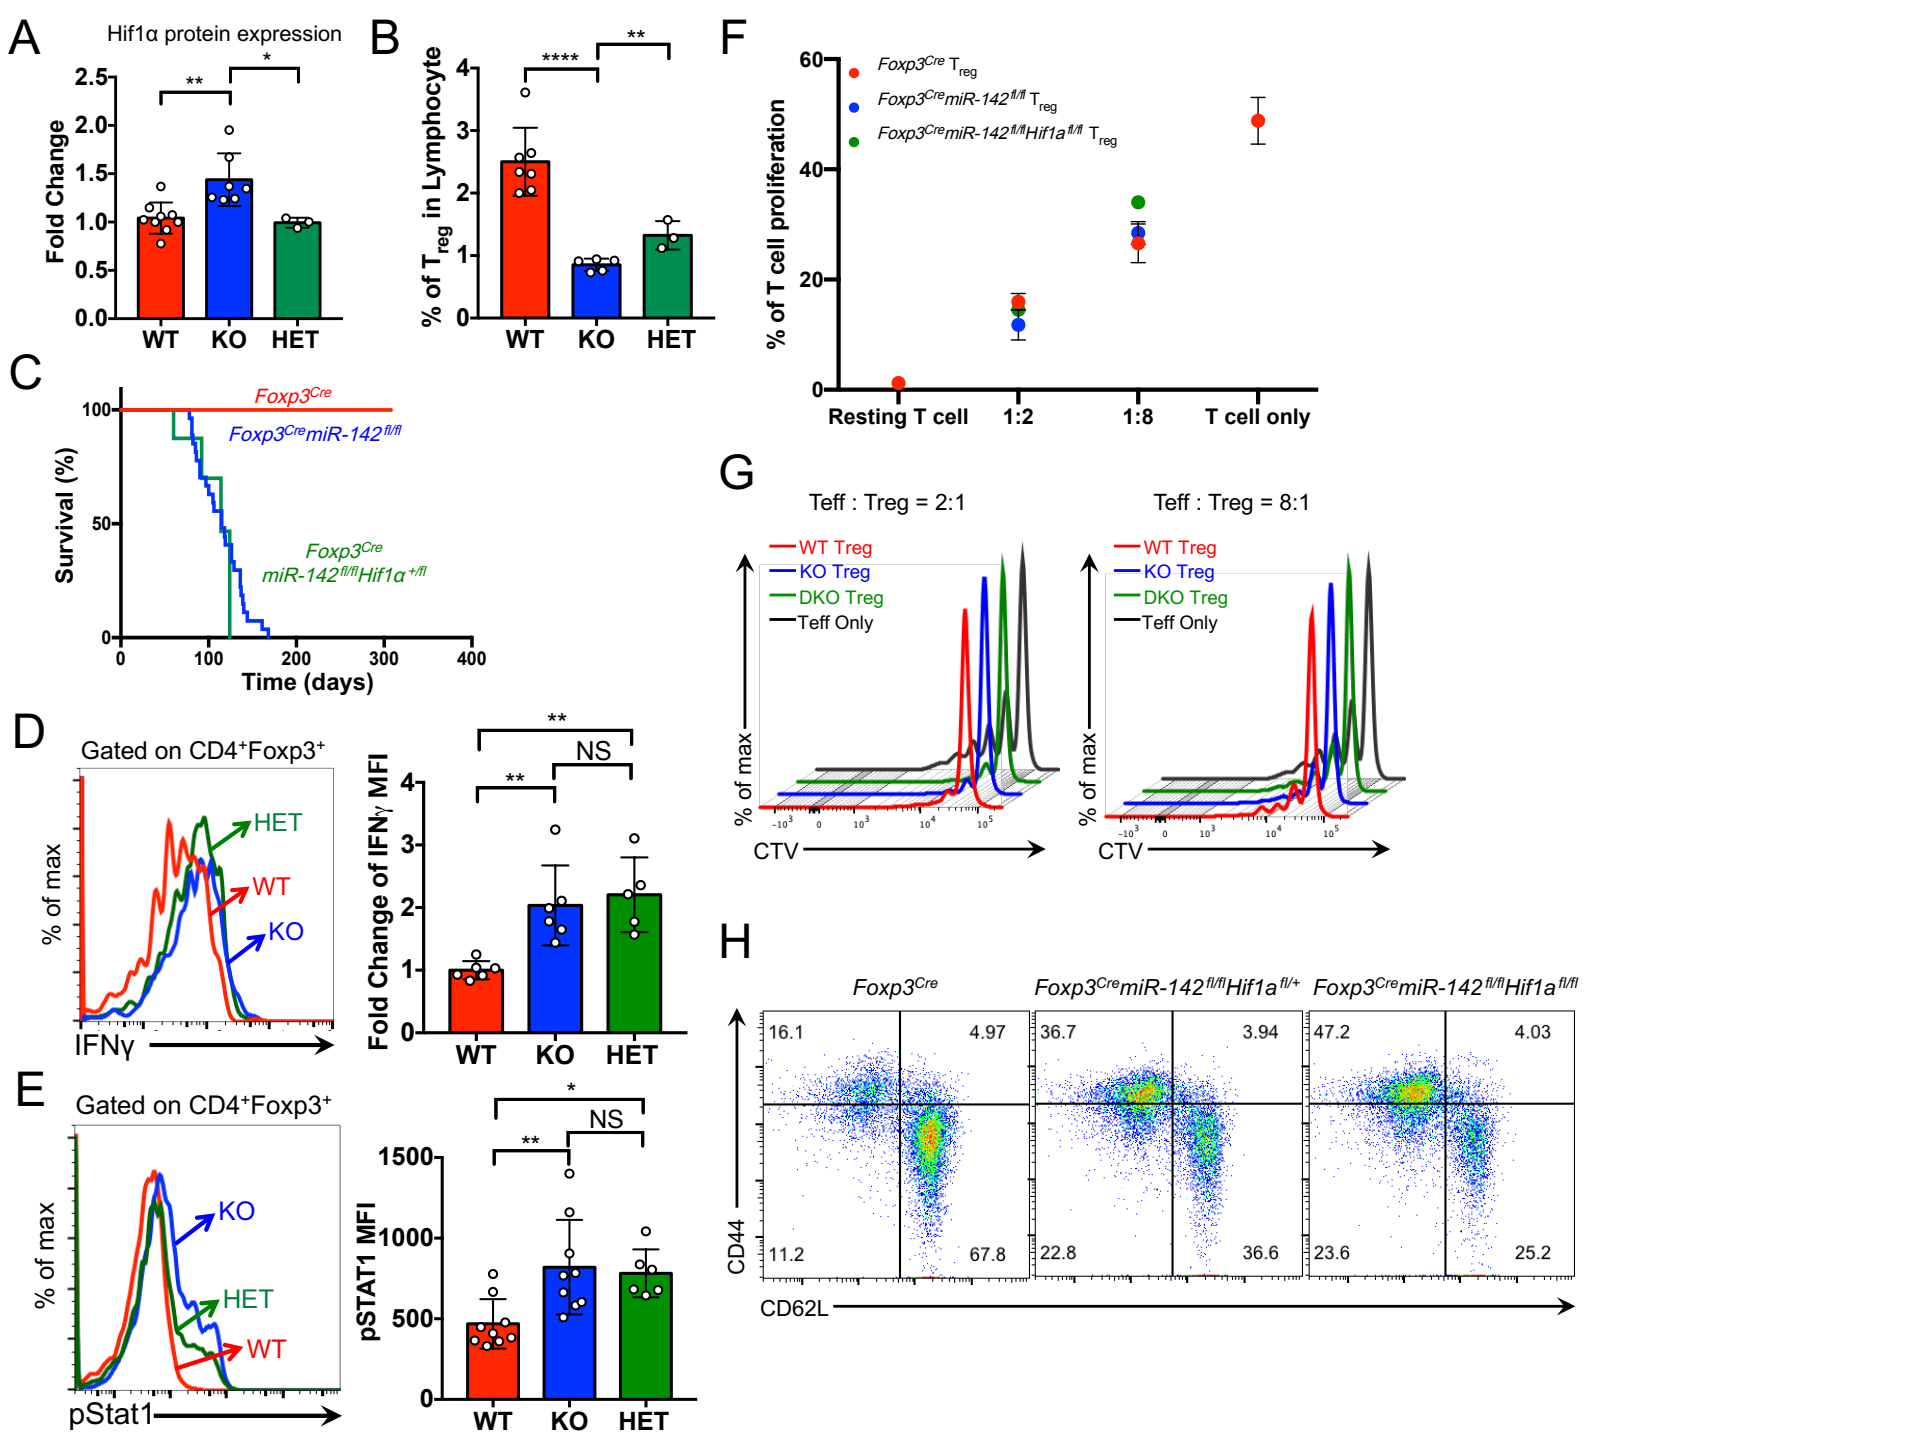

Supplement: pbio.3001552.s006.pdf [file pbio.3001552.s006.pdf]
